# Supplementary material for: The nature of the purine at position 34 in tRNAs of 4-codon boxes is correlated with nucleotides at positions 32 and 38 to maintain decoding fidelity
Source: PubMed Central journal article supplement — Nucleic Acids Res. 2020 Apr 8;48(11):6170–83. doi: 10.1093/nar/gkaa221 (PMC7293025; doi:10.1093/nar/gkaa221), 2020-04-08

## Supplementary information

### Captions for supplementary figures

#### **Figure S1: PKI structurally and functionally mimics a codon-anticodon helix**

Comparison of the base pairing between the tRNA anticodon numbered 34, 35, 36 with a cognate codon numbered 1, 2, 3 shown on the left and the pseudoknot PKI from CrPV Intergenic IRES. Structure of the Anticodon Stem Loop or ASL (in orange) base paired to a cognate codon in the A site of the ribosome (on the left) and structure of PKI in the A site of the ribosome (on the right) are represented from respectively X-ray (pdb:5e81) (16) and CryoEM (pdb: 5it9) (33) molecular models. The tRNA anticodon part is in red and the mRNA codon part in cyan. In the IRES structure, the 5'-end of the "mRNA" continues to pair with the "anticodon 37 and 38". A library containing the 4096 codon-anticodon combinations in the frame of PKI was generated.

#### **Figure S2: Ultrahigh-throughput screening of randomized IRES gene libraries.**

**(a)** Schematic of the droplet-based microfluidic screening pipeline. The screening pipeline operates in three main steps. First, the genes of the library are diluted into a PCR mixture prior to being individualized into small picoliter-sized water-in-oil droplets (left device). The emulsion is collected off-chip into a conventional PCR tube and the whole emulsion is thermocycled into a regular thermocycler. Next, the amplified DNA-containing droplets (orange) are reinjected into a fusion device (middle device) and synchronized with on-chip generated droplets (red) containing an *in vitro* expression mixture (a Rabbit Reticulocyte Lysate supplemented in T7 RNA polymerase in this study). Both sets of droplets are synchronized, fused by an electric field and collected off-chip. Genes are then expressed during an off-chip incubation step prior to reinjecting the droplets into a last device (right device) aiming at analyzing droplets fluorescence and sorting them accordingly. **(b)** Occurrence frequency matrix of the 4096 variants contained in the starting gene library. The occurrence frequency has been calculated for each variant contained in the starting library and the value was color-coded accordingly. The ~ 6-fold occurrence difference between the most and the least represented variant is supportive of a generally unbiased the library and confirmed that a ~ 37-fold coverage was enough to see

each variant during the first rounds of screening. **(c)** Representation of the evenness of the variants contained in the starting library. Sequences were ordered and numbered according to their occurrence in the library (a sequence ID inversely proportional to the occurrence was attributed each sequence) prior to being plotted as a function of their cumulative occurrence. The straight alignment of the point is indicative of an overall even representation of the different variants. **(d)** GFP fluorescence profile of the droplets from the two replicates of the experiment. In each experiment, the dashed line indicates the lower limit of the sorting gate. The sorting gate was set such that every droplet with a fluorescence detached from the negative population was recovered. **(e)** Representation evenness of the variants selected in each replicate. Sequences were ordered and numbered according to their occurrence in the library (a sequence ID inversely proportional to the occurrence was attributed each sequence) prior to being plotted as a function of their cumulative occurrence. Sequences corresponding to molecules initially individualized and amplified several hundreds of times in droplets are expected to be over-represented in comparison to those coming from a rare mutation event during PCR or from a sequencing error. Therefore, whereas the formers are expected to accumulate at a high, the latter should accumulate more slowly and a biphasic curve like those observed here is expected. Consequently, the breakpoint at the junction of both curves corresponds to the threshold between the relevant sequences (signal) and the non-relevant ones (noise). The Venn diagram represents the combinations that are present in both replicates.

**Figure S3: Combinations of codon-anticodon containing Watson-Crick base pairs that are selected**

The combinations are ranked according the 3-34 pair and their proportion is shown in parentheses. Interestingly, the combinations Y3/R34 are two times more frequent than the combinations R3/Y34. The amino acids coded by the corresponding codons are shown under each combination. No combination was selected for Methionine, Glutamic acid, Lysine and the three stop codons.

**Figure S4: Combinations of codon-anticodon containing Watson-Crick base pairs that are not selected**

The combinations are ranked according the position of A/U base pairs (shown in blue). Start (green dot) and stop codons (red dots) are indicated. The proportion of each category is shown under the figure. The two pie charts represent the proportion of nucleotides at position 34 and 3 in these missing combinations.

**Figure S5: Combinations of selected codon-anticodon containing Watson-Crick base pairs with one or two mismatches**

**(a)** The codon-anticodon combinations are listed according to the position of the mismatches. There are 56 combinations with one mismatch and three with two. The mismatches are colour-coded (G/U in green, G/A in orange, C/A in yellow, C/U in brown, A-A in dark grey, U-U in purple and G-G in light grey). The proportion and position of each mismatch are summarized at the bottom. About 2/3 of mismatches occur at the third “wobble” position and the most frequent are G/U (12), G/A (10), C/A (6) and C/U (5).

**(b)** The histogram represents the number of mismatches obtained for each of the three positions of the codon. The pie charts represent the proportion of each of the four nucleotides at position 34 in the codon-anticodon combinations containing mismatches at position 1 and 2, and at position 3 of the codon.

**(c)** The histograms represent the total number of each type of mismatch at the three positions of the codon.

**Figure S6: Combinations of selected codon-anticodon interacting with one or two mismatches.**

**(a)** The histogram represents the number of G/U (green), C/A (yellow), G/A (orange) and U/C mismatches (brown) found in each of the 3 positions of the codon. Striped bars represent the orientations 1-36, 2-35 and 3-34 and full bars represent the opposite orientations. The pie charts represent the proportion of each orientation in the 3 positions of the codon.

**(b)** The histogram represents the relative Renilla luciferase activity obtained with PKI in frame of a Renilla luciferase reporter with several codon-anticodon combinations. Combinations that were selected through the microfluidic pipeline are indicated by (+) and combinations that were not selected are indicated by (-).

**(c)** Experimental validation of the preferred orientation of G/U mismatches at the position 3 of the codon. The histogram represents the relative Renilla luciferase

activities of codon-anticodon combinations in PK1 with G/U mismatches in both orientation at the three positions of the codons and in frame with a Renilla coding sequence.

**Figure S7: Second selection on the combinations in ‘stringent’ conditions.**

**(a)** GFP fluorescence profile of the droplets from the two replicates of the selection in stringent conditions. In each experiment, the dashed line indicates the lower limit of the sorting gate. Representation evenness of the variants selected in each replicate is shown below the fluorescent profiles. Sequences were ordered and numbered according to their occurrence in the library (a sequence ID inversely proportional to the occurrence was attributed each sequence) prior to being plotted as a function of their cumulative occurrence. The straight alignment of the point is indicative of an overall even representation of the different variants. The Venn diagram represents the combinations that are present in both replicates. **(b)** The sequences of the active codon-anticodon pairs that are efficiently recognized by the ribosome in ‘stringent’ conditions are plotted on a matrix. The 64 codons are represented on the x-axis and 64 anticodons are represented on the y-axis. The nucleotides of the codons are numbered 1, 2 and 3 from 5’ to 3’. The nucleotides of the anticodons are numbered 34, 35, 36 from 5’ to 3’ according to their position in tRNAs. The active codon-anticodon combinations are represented on the matrix by black squares (Watson-Crick pairs are along the diagonal) and by coloured squares for combinations containing mismatches that are parallel to the diagonal. The total number of hits is indicated on the upper right part of the matrix. The number of selected codon-anticodon pairs containing A, C, G and U at position 34 (anticodon) are shown on the right of the matrix. The number of selected codon-anticodon pairs containing A, C, G and U at position 3 (codon) are shown above the matrix. **(c)** Histogram representing the number of mismatches obtained in each of the three positions of the codons. The proportion of each of the four nucleotides at position 34 is shown in the pie charts for mismatches at positions 1 and 2 and at position 3.

**Figure S8: The anticodons with a G34 are prone to miscoding**

The 51 active codon-anticodon pairs containing G34 that are selected in the ‘Relaxed’ selection procedure are plotted on the matrix. Combinations containing

Watson-Crick base pairs are represented by black squares (15) and combinations containing mismatches (36) are highlighted using coloured squares according to the figure legend. The combinations that would lead to miscoding (and not G/U wobbling) are circled. The codons that are incorrectly decoded are indicated above the matrix and the anticodons that induce miscoding are shown on the right. The resulting miscoding events would, in a natural system, induce incorporations of non-cognate amino acids (in black) instead of the cognate amino acids (in red). An asterisk indicates the miscoding combination (Pro>Ser or  ${}^1\text{CCC}_{3/34}\text{GGA}_{36}$ ) that has been validated with a reporter gene by Mass Spectrometry (see S10).

**Figure S9: Evolutionary clearance of G34 containing tRNAs in eukaryotic tRNAs of 3- and 4-codon boxes.**

The heat map represents the ratio of the number of each of the putative tRNA gene corresponding to the 64 anticodons divided by the total number of tRNA genes in various eukaryotic genomes. The colour code is indicated at the bottom of the figure from black for abundant tRNA genes to white for tRNA genes that are absent from eukaryotic genomes. The species are indicated at the top of the figure and the anticodon for each tRNA gene, the corresponding codon and the amino acid identity are shown in the table on the right part of the figure. The orange boxes indicate that the tRNA genes containing anticodon starting with an A at position 34 are rare or absent. The yellow boxes indicate that the tRNA genes containing an anticodon starting with a G at position 34 are rare or absent. The cartoon on the right part summarizes the results on the heat map. In eukaryotes, the A34-containing tRNA genes were cleared throughout evolution in 2-box tRNA sets and the G34-containing tRNA genes have been cleared in 3- and 4-box tRNA sets (with the exception of Gly, a 4-box tRNA in which A34 has been cleared to favour G34). In eukaryotes, A34 is modified into I34; the clearance of A34 in 2-codon boxes results from the miscoding potential of I (that can pair with C, U, and A)(59).

**Figure S10: Anticodons containing G34 do promote miscoding in Rabbit Reticulocyte Lysates.**

The Renilla luciferase protein produced in rabbit reticulocyte lysate in the presence of *Homo sapiens* tRNA<sup>Ala</sup><sub>GNN</sub> transcripts and synthetic Renilla mRNA was purified via its C-terminal HA-tag, digested by trypsin and analysed by Mass Spectrometry. **(a)**

Mass Spectrometry analysis of the peptide sequence from Renilla luciferase protein produced in presence of *Homo sapiens* tRNA<sup>Ala</sup><sub>GGA</sub>. The upper panel represents the wild-type peptide (253MFIESDPGFFSNAIVEGAK<sub>271</sub>) containing the expected Serine residue highlighted in yellow at the position of the Serine UCC codon inserted by endogenous tRNA<sup>Ser</sup>. The lower panel shows the same peptide where the Serine was substituted with an Alanine residue (also in yellow) by the exogenous *Homo sapiens* tRNA<sup>Ala</sup><sub>GGA</sub> transcript confirming that this synthetic chimera is efficiently alanylated by endogenous AlaRS and picked up by ribosomes available in Rabbit Reticulocyte Lysates. **(b)** Mass Spectrometry analysis of the same reporter peptide. The upper panel shows the sequence of the peptide containing the expected Proline residue highlighted in yellow at the position of the Proline CCC codon inserted by endogenous tRNA<sup>Pro</sup>. The lower panel shows the peptide where the Proline was substituted with Alanine (also in yellow) by the exogenous *Homo sapiens* tRNA<sup>Ala</sup><sub>GGA</sub> confirming that this anticodon supports miscoding when a C-A mismatch is present at the first position of the codon.

Figure S1

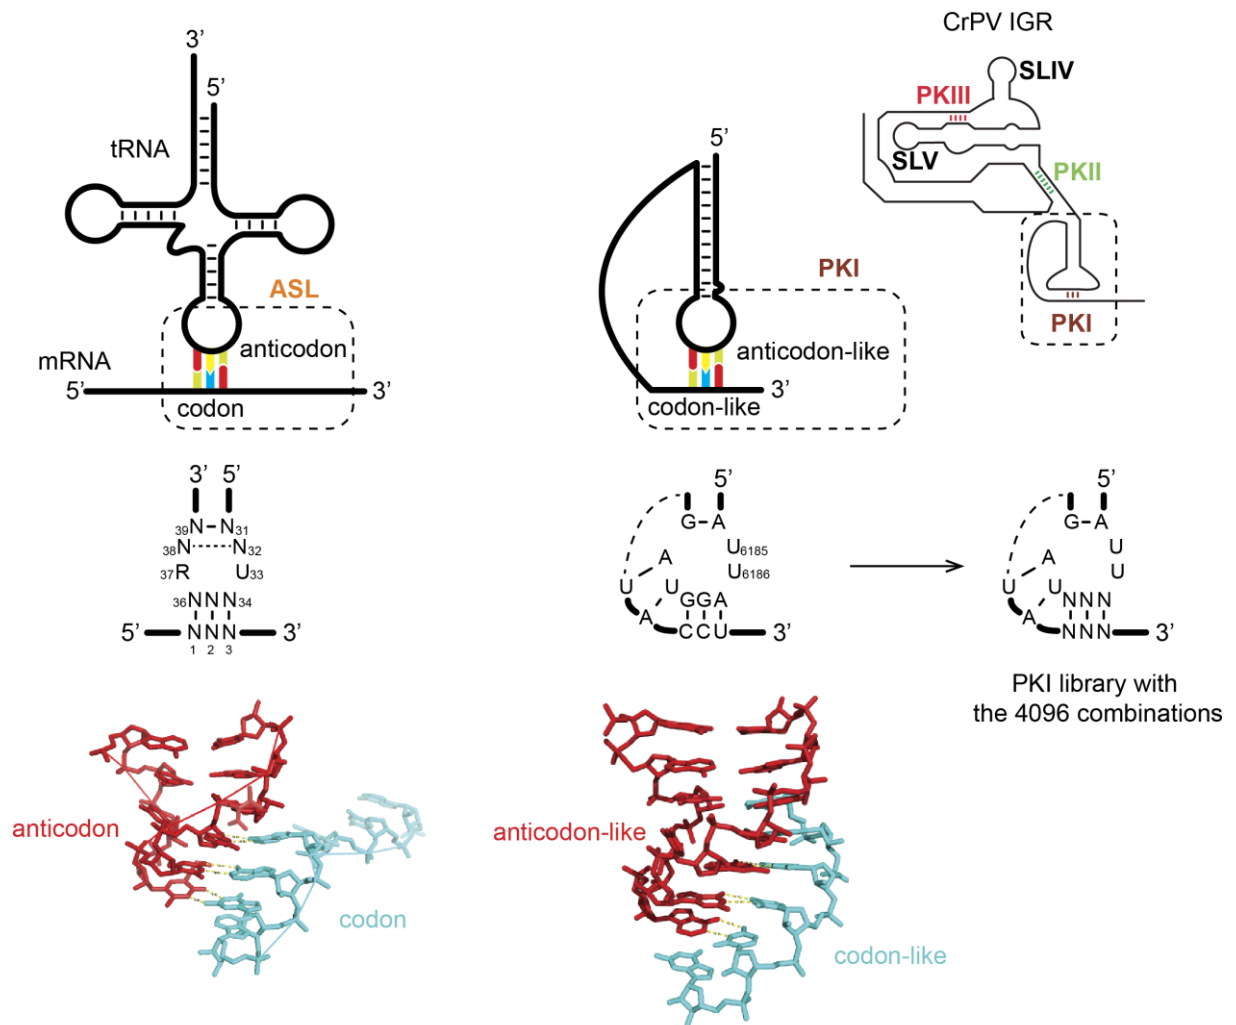

Figure S2

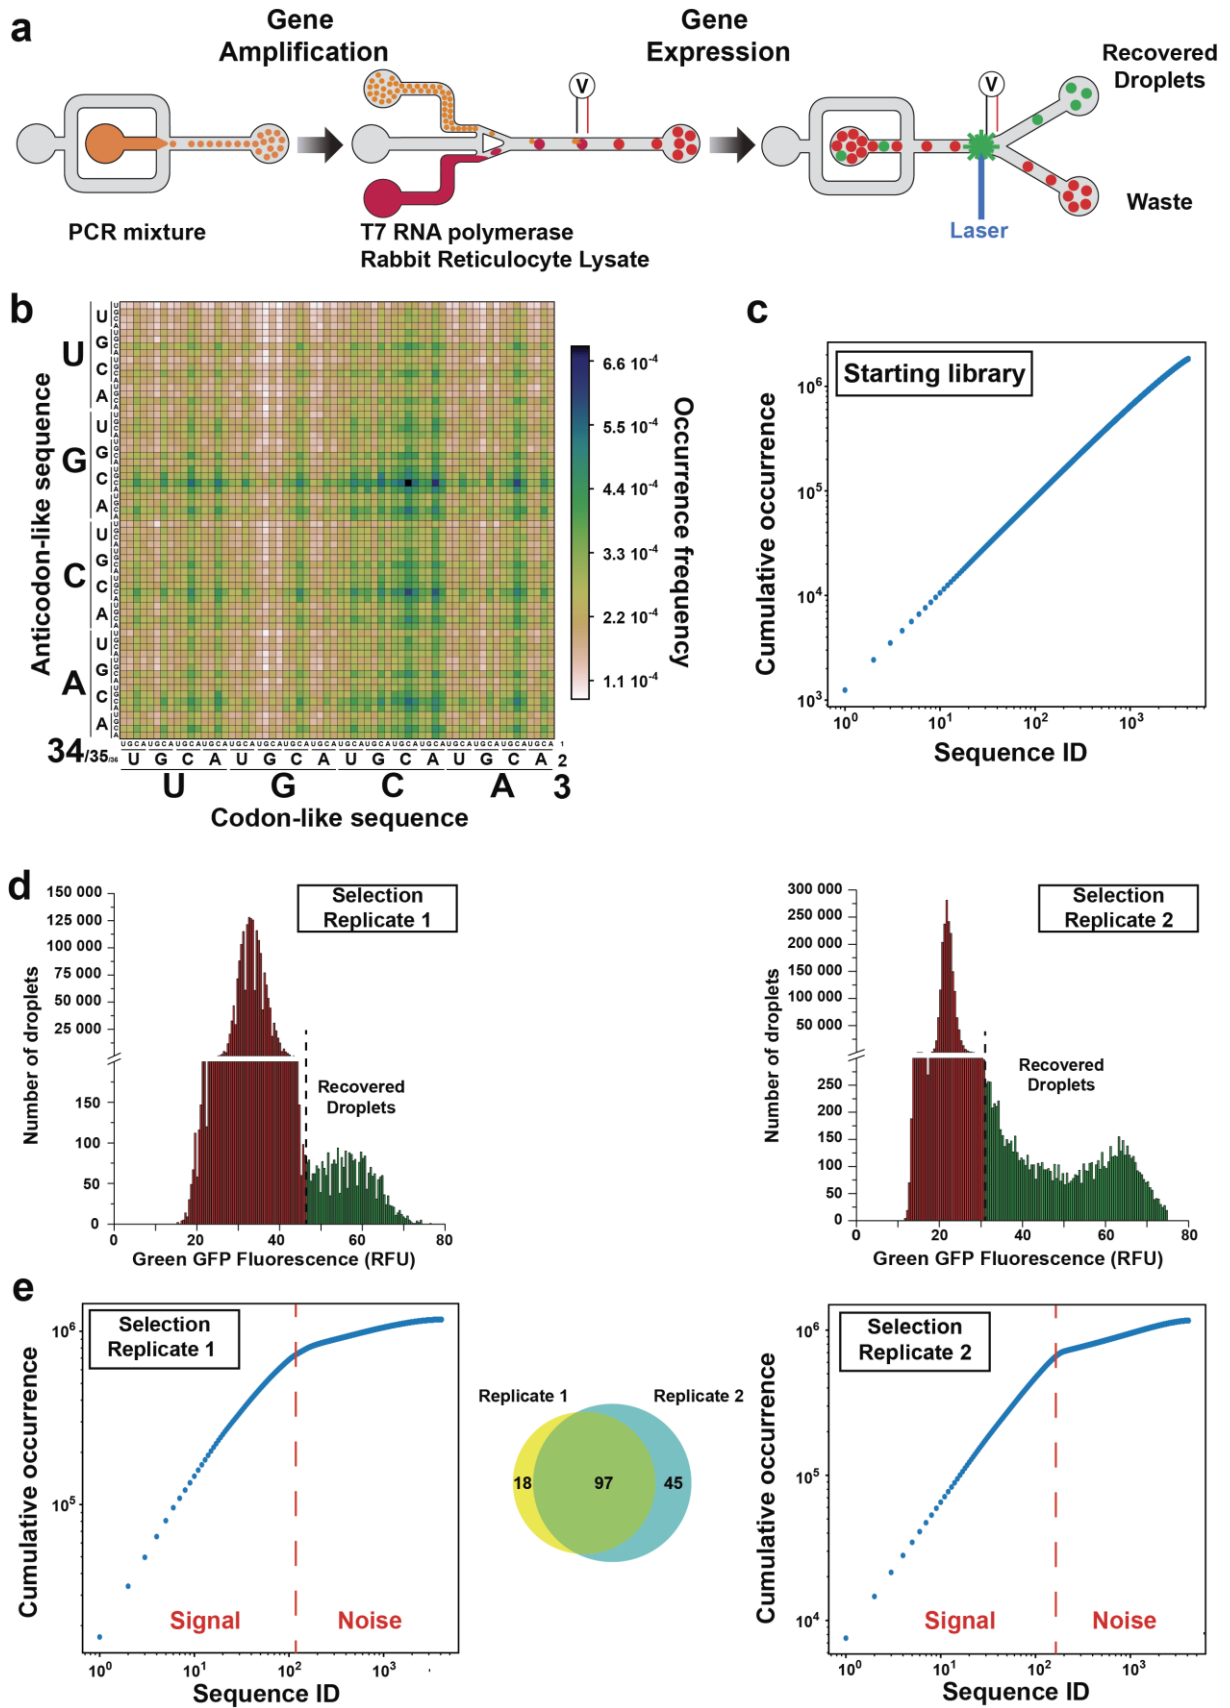



Figure S3

38 Combinations with Watson-Crick base pairs

missing combinations for : Met, Glu, Lys, stop codons

A3/U34  
(5/38)

|     |    |    |     |    |    |     |    |    |     |    |    |     |    |    |
|-----|----|----|-----|----|----|-----|----|----|-----|----|----|-----|----|----|
| 36  | 35 | 34 | 36  | 35 | 34 | 36  | 35 | 34 | 36  | 35 | 34 | 36  | 35 | 34 |
| G   | C  | U  | A   | G  | U  | G   | G  | U  | U   | G  | U  | G   | U  | U  |
| C   | G  | A  | U   | C  | A  | C   | C  | A  | A   | C  | A  | C   | A  | A  |
| 1   | 2  | 3  | 1   | 2  | 3  | 1   | 2  | 3  | 1   | 2  | 3  | 1   | 2  | 3  |
| Arg |    |    | Ser |    |    | Pro |    |    | Thr |    |    | Gln |    |    |

U3/A34  
(10/38)

|     |    |    |     |    |    |     |    |    |     |    |    |     |    |    |     |    |    |     |    |    |     |    |    |     |  |  |     |  |  |
|-----|----|----|-----|----|----|-----|----|----|-----|----|----|-----|----|----|-----|----|----|-----|----|----|-----|----|----|-----|--|--|-----|--|--|
| 36  | 35 | 34 | 36  | 35 | 34 | 36  | 35 | 34 | 36  | 35 | 34 | 36  | 35 | 34 | 36  | 35 | 34 | 36  | 35 | 34 | 36  | 35 | 34 |     |  |  |     |  |  |
| A   | A  | A  | C   | A  | A  | G   | A  | A  | U   | A  | A  | G   | C  | A  | U   | C  | A  | C   | U  | A  | G   | U  | A  |     |  |  |     |  |  |
| U   | U  | U  | G   | U  | U  | C   | U  | U  | A   | U  | U  | C   | G  | U  | G   | C  | U  | G   | A  | U  | C   | A  | U  |     |  |  |     |  |  |
| 1   | 2  | 3  | 1   | 2  | 3  | 1   | 2  | 3  | 1   | 2  | 3  | 1   | 2  | 3  | 1   | 2  | 3  | 1   | 2  | 3  | 1   | 2  | 3  |     |  |  |     |  |  |
| Phe |    |    | Val |    |    | Leu |    |    | Ile |    |    | Arg |    |    | Ser |    |    | Ala |    |    | Pro |    |    | Asp |  |  | His |  |  |

G3/C34  
(8/38)

|     |    |    |     |    |    |     |    |    |     |    |    |     |    |    |     |    |    |     |    |    |     |   |   |
|-----|----|----|-----|----|----|-----|----|----|-----|----|----|-----|----|----|-----|----|----|-----|----|----|-----|---|---|
| 36  | 35 | 34 | 36  | 35 | 34 | 36  | 35 | 34 | 36  | 35 | 34 | 36  | 35 | 34 | 36  | 35 | 34 | 36  | 35 | 34 |     |   |   |
| G   | A  | C  | A   | C  | C  | G   | C  | C  | A   | G  | C  | C   | G  | C  | G   | G  | C  | U   | G  | C  | G   | U | C |
| C   | U  | G  | U   | G  | G  | C   | G  | G  | U   | C  | G  | C   | C  | G  | C   | A  | C  | A   | C  | G  | C   | A | G |
| 1   | 2  | 3  | 1   | 2  | 3  | 1   | 2  | 3  | 1   | 2  | 3  | 1   | 2  | 3  | 1   | 2  | 3  | 1   | 2  | 3  | 1   | 2 | 3 |
| Leu |    |    | Trp |    |    | Arg |    |    | Ser |    |    | Ala |    |    | Pro |    |    | Thr |    |    | Gln |   |   |

C3/G34  
(15/38)

|     |    |    |     |    |    |     |    |    |     |    |    |     |    |    |     |    |    |     |    |    |     |    |    |     |    |    |     |    |    |     |    |    |     |    |    |     |   |   |     |   |   |     |   |   |
|-----|----|----|-----|----|----|-----|----|----|-----|----|----|-----|----|----|-----|----|----|-----|----|----|-----|----|----|-----|----|----|-----|----|----|-----|----|----|-----|----|----|-----|---|---|-----|---|---|-----|---|---|
| 36  | 35 | 34 | 36  | 35 | 34 | 36  | 35 | 34 | 36  | 35 | 34 | 36  | 35 | 34 | 36  | 35 | 34 | 36  | 35 | 34 | 36  | 35 | 34 | 36  | 35 | 34 | 36  | 35 | 34 | 36  | 35 | 34 | 36  | 35 | 34 |     |   |   |     |   |   |     |   |   |
| A   | A  | G  | C   | A  | G  | G   | A  | G  | A   | C  | G  | C   | C  | G  | G   | C  | G  | U   | C  | G  | A   | G  | C  | C   | G  | C  | G   | G  | C  | G   | U  | C  | G   | U  | G  | U   | A | C | U   | A | C |     |   |   |
| U   | U  | C  | G   | U  | C  | C   | U  | C  | U   | G  | C  | G   | G  | C  | A   | U  | C  | A   | C  | G  | U   | A  | C  | C   | U  | A  | C   | C  | C  | C   | A  | G  | C   | A  | C  | A   | A | C | A   | A | C |     |   |   |
| 1   | 2  | 3  | 1   | 2  | 3  | 1   | 2  | 3  | 1   | 2  | 3  | 1   | 2  | 3  | 1   | 2  | 3  | 1   | 2  | 3  | 1   | 2  | 3  | 1   | 2  | 3  | 1   | 2  | 3  | 1   | 2  | 3  | 1   | 2  | 3  | 1   | 2 | 3 | 1   | 2 | 3 | 1   | 2 | 3 |
| Phe |    |    | Val |    |    | Leu |    |    | Cys |    |    | Gly |    |    | Arg |    |    | Ser |    |    | Ser |    |    | Ala |    |    | Pro |    |    | Thr |    |    | Tyr |    |    | Asp |   |   | His |   |   | Asn |   |   |

Figure S4

26 missing combinations with Watson-Crick base pairs

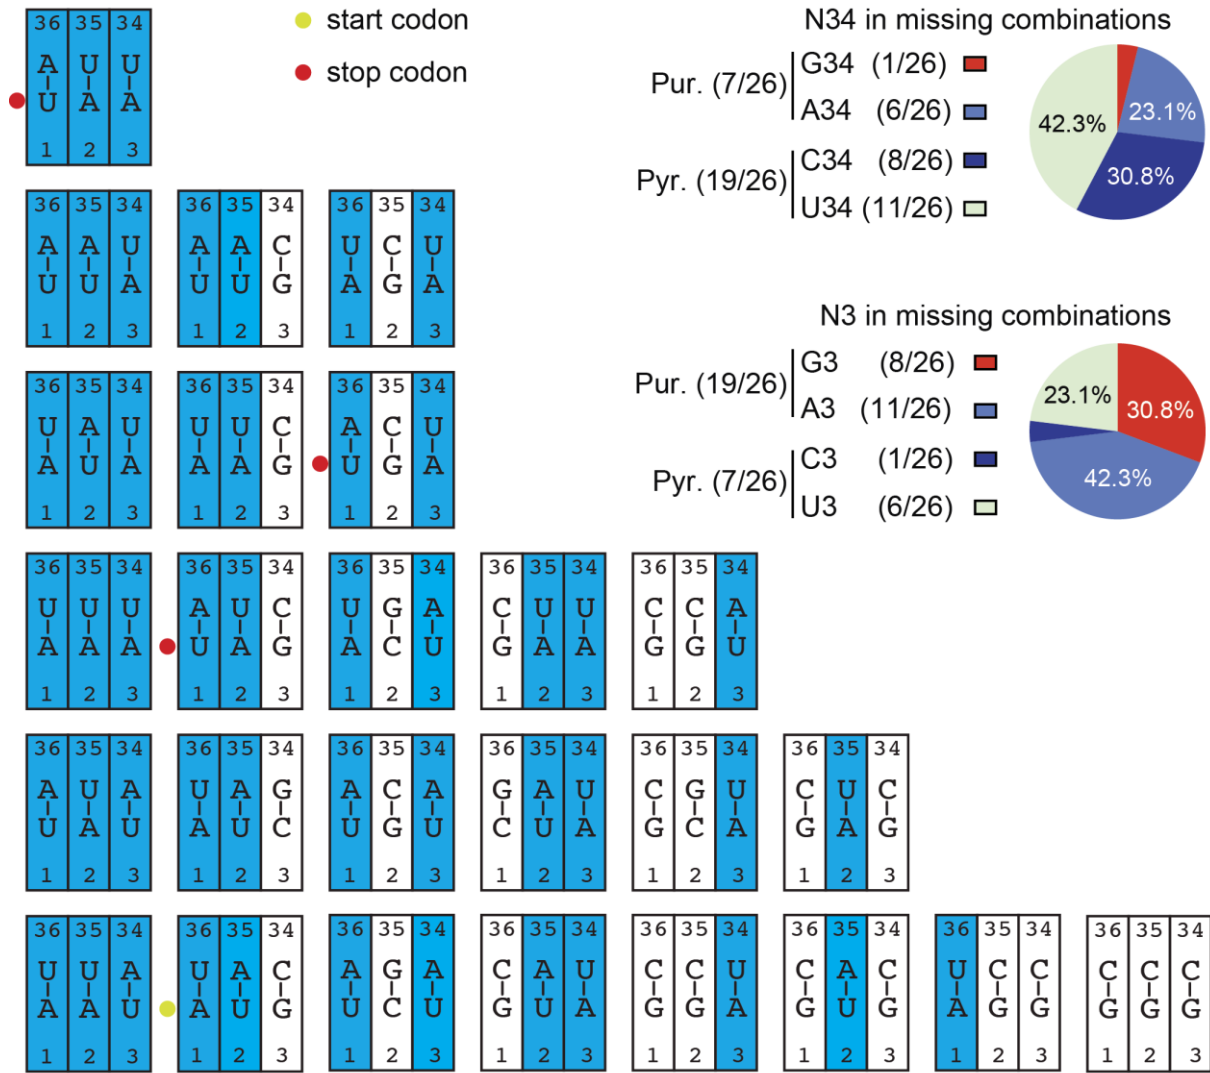

Summary

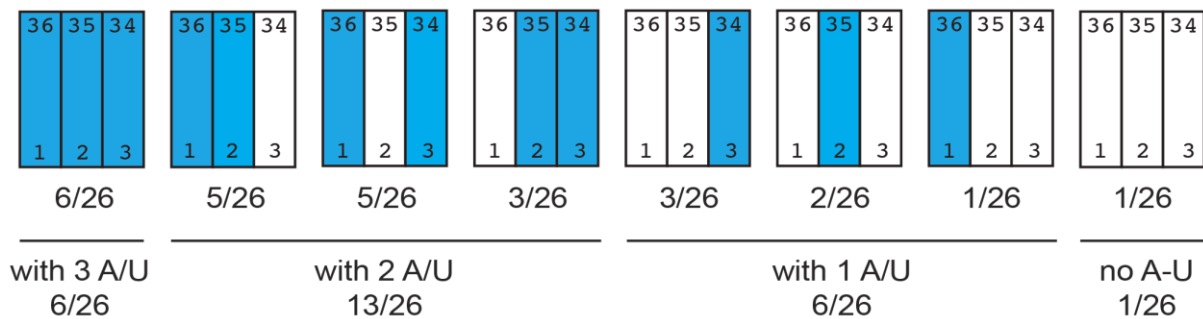

Figure S5a

59 combinations with one or two mismatches

56 combinations  
(1 mismatch)

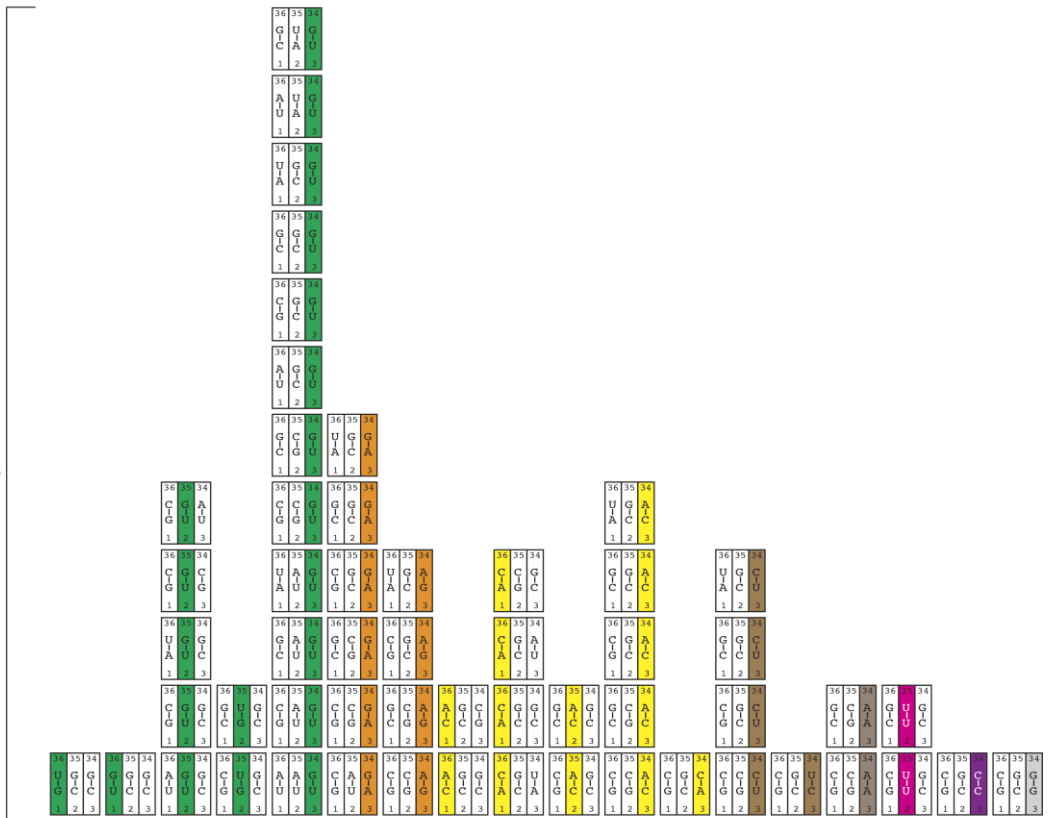

Summary

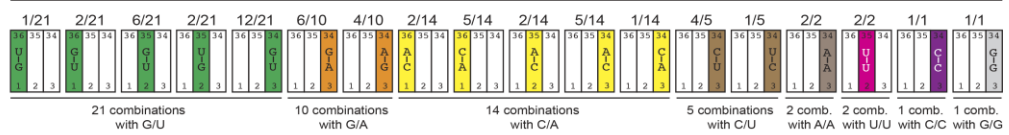

3 combinations  
(2 mismatches)

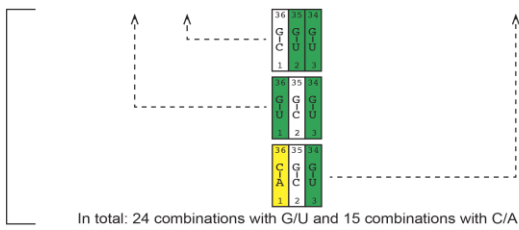

Figure S5

Combinations with mismatches

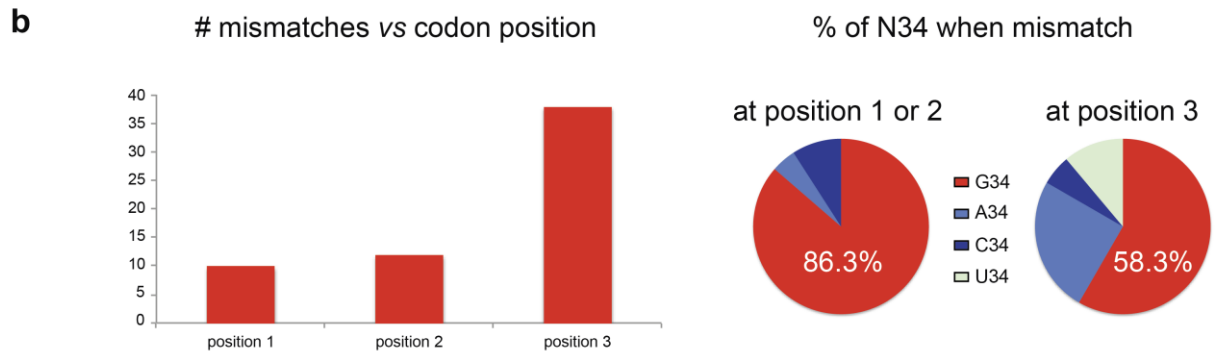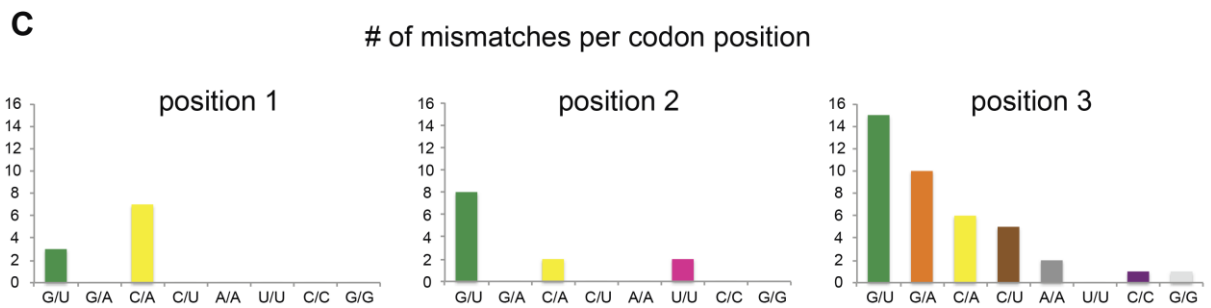

Figure S6a

**a** Combinations with mismatches in both orientations

# of mismatches and orientation per codon position

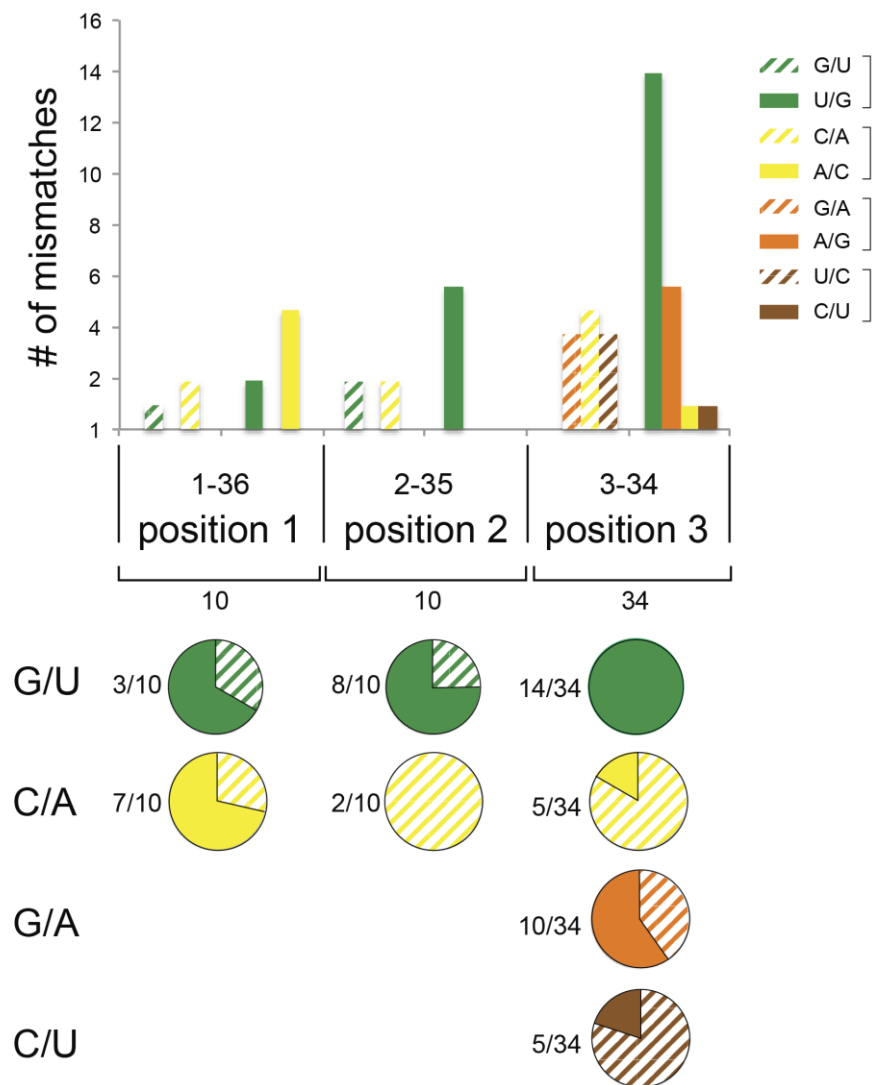

Figure S6b-c

**b**

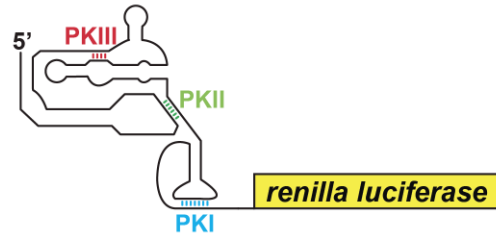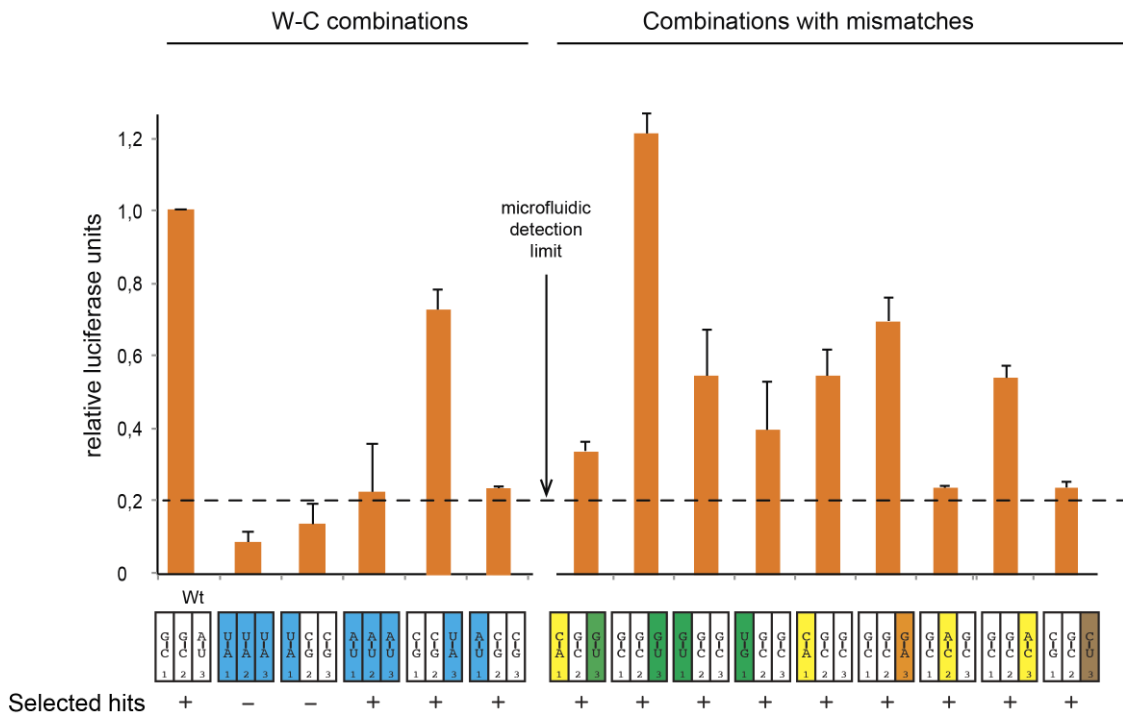

**c**

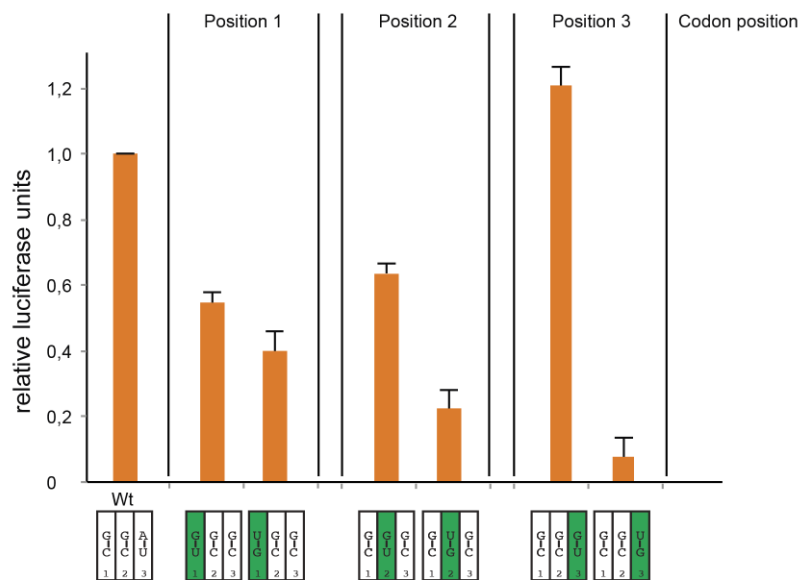

Figure S7

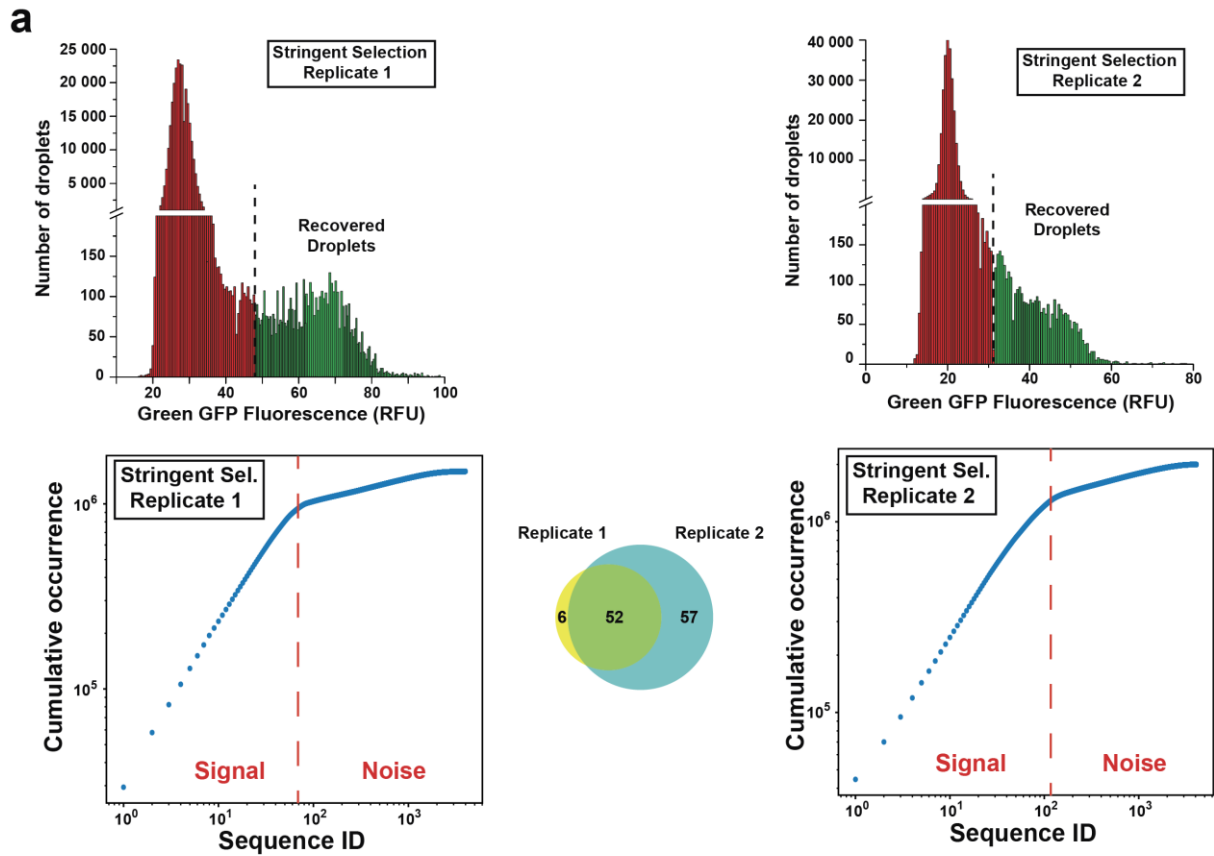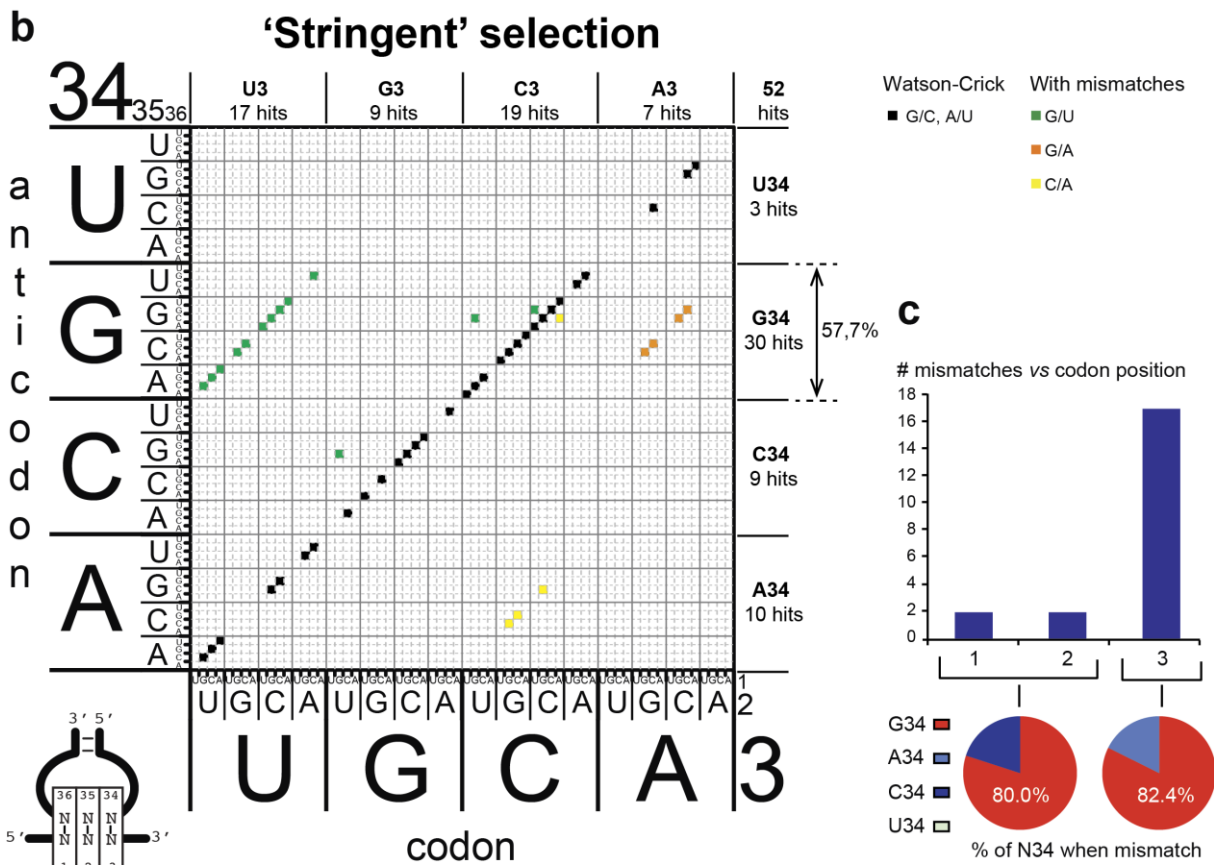

Figure S8

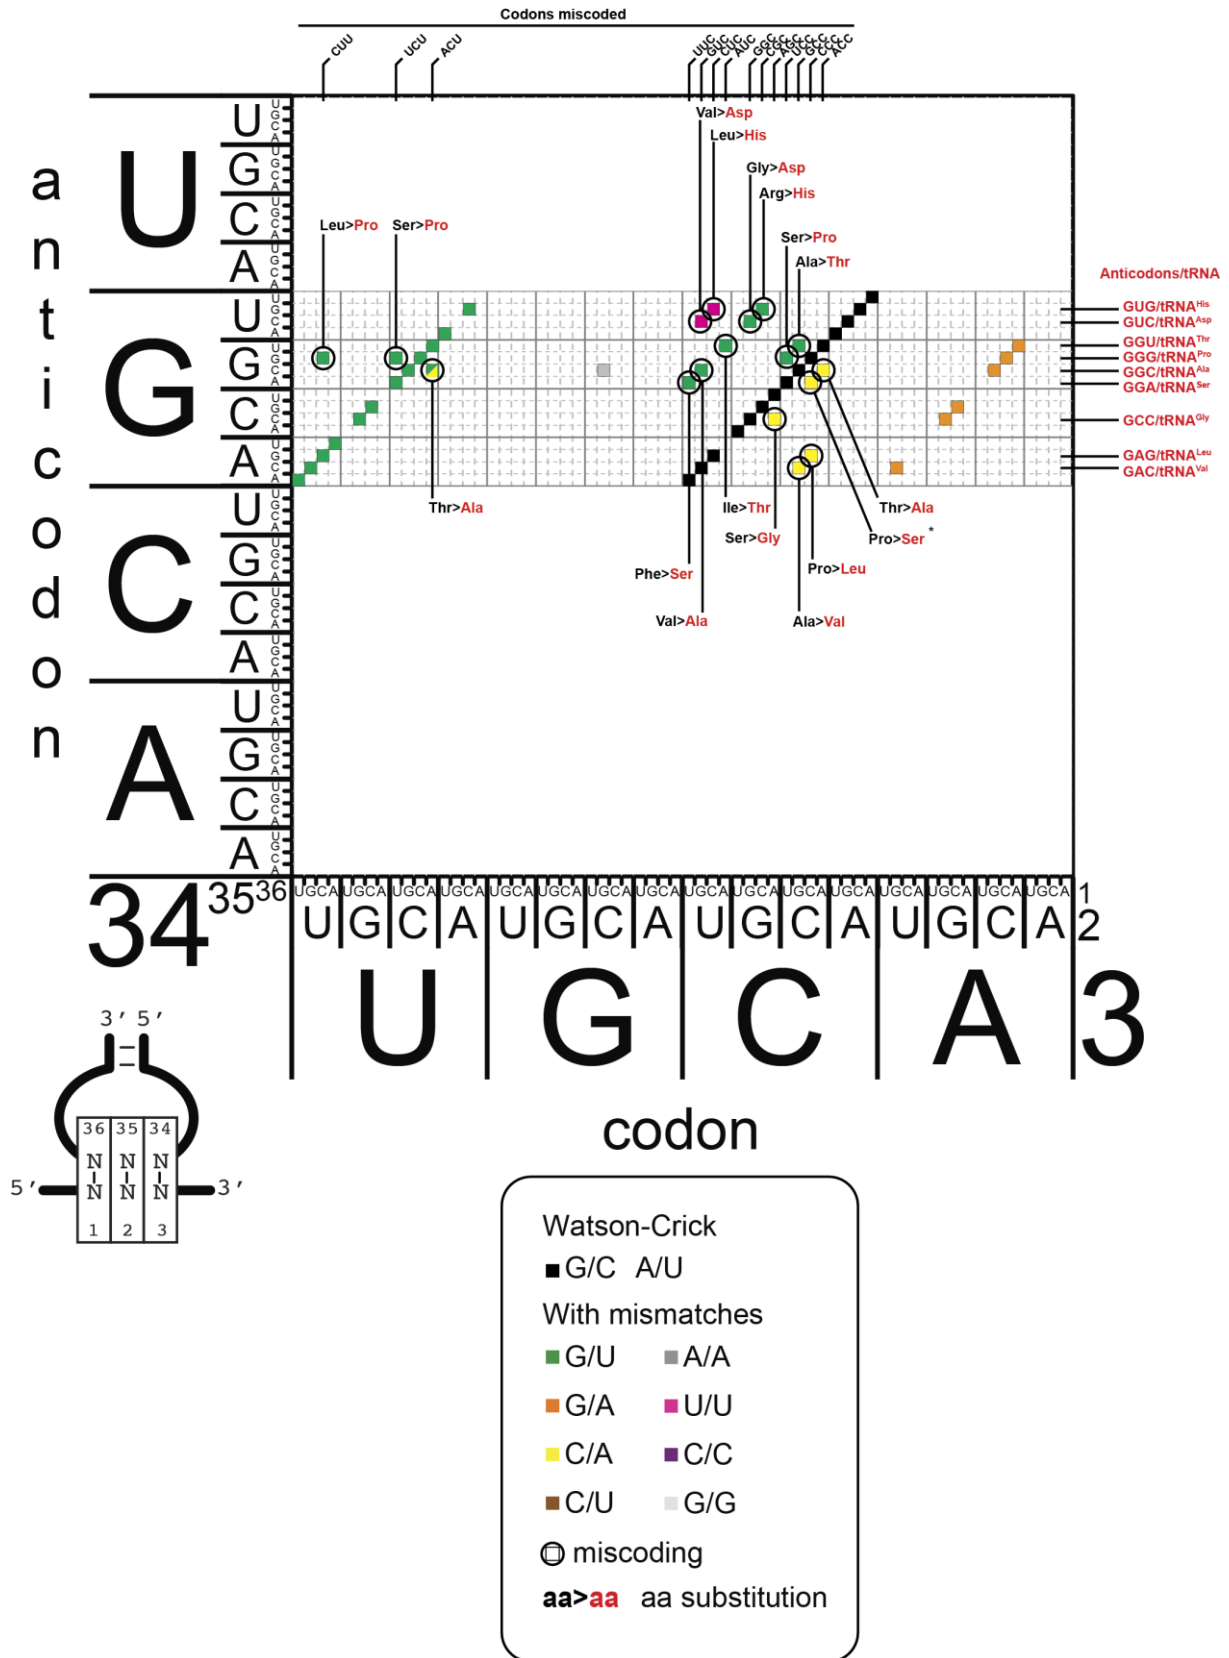



Figure S9

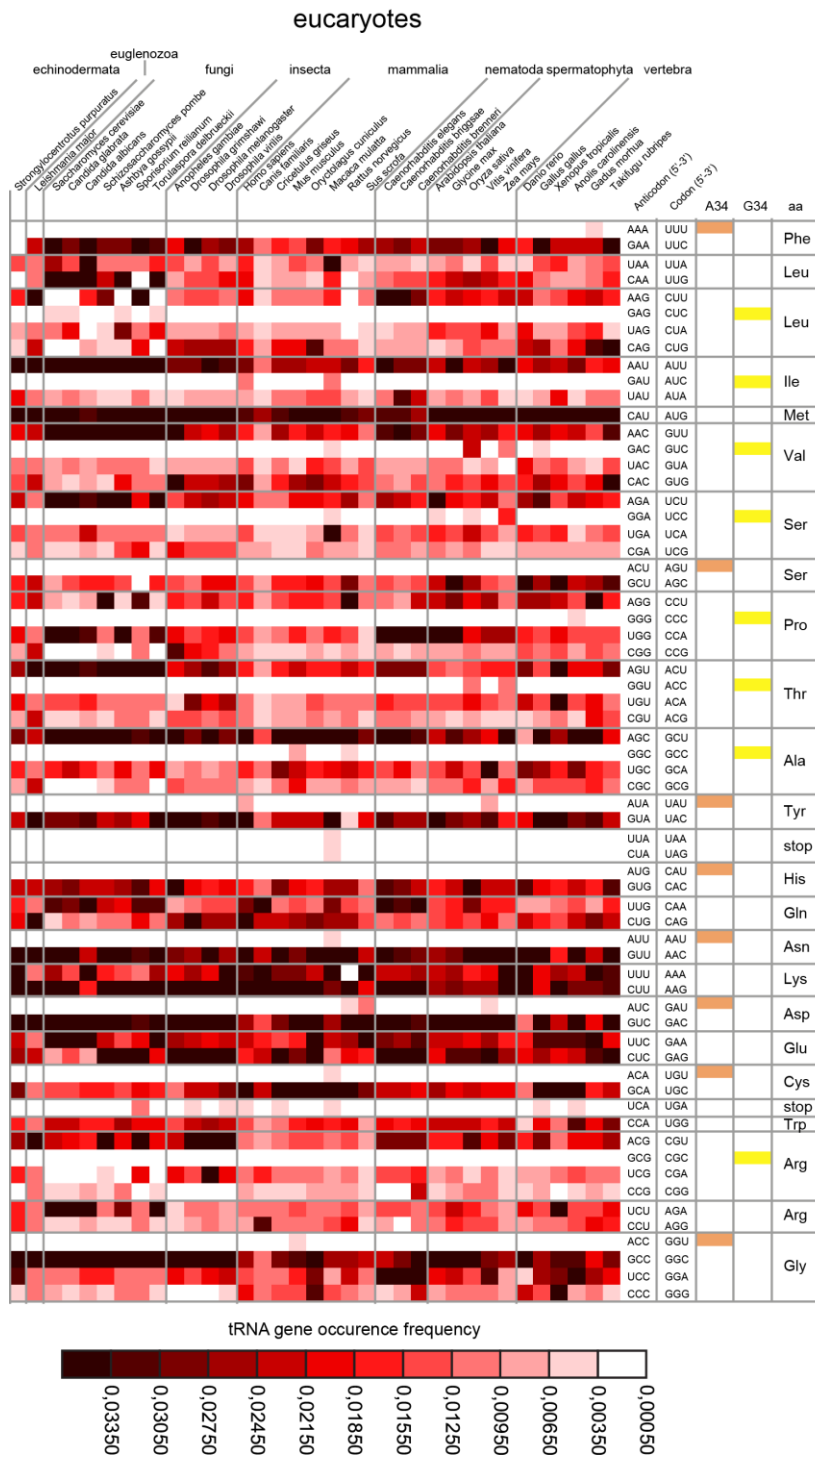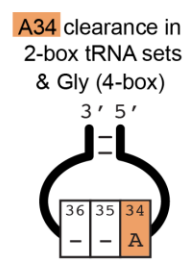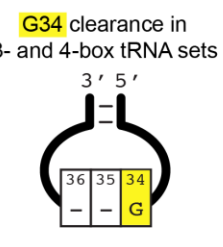

Figure S10

a

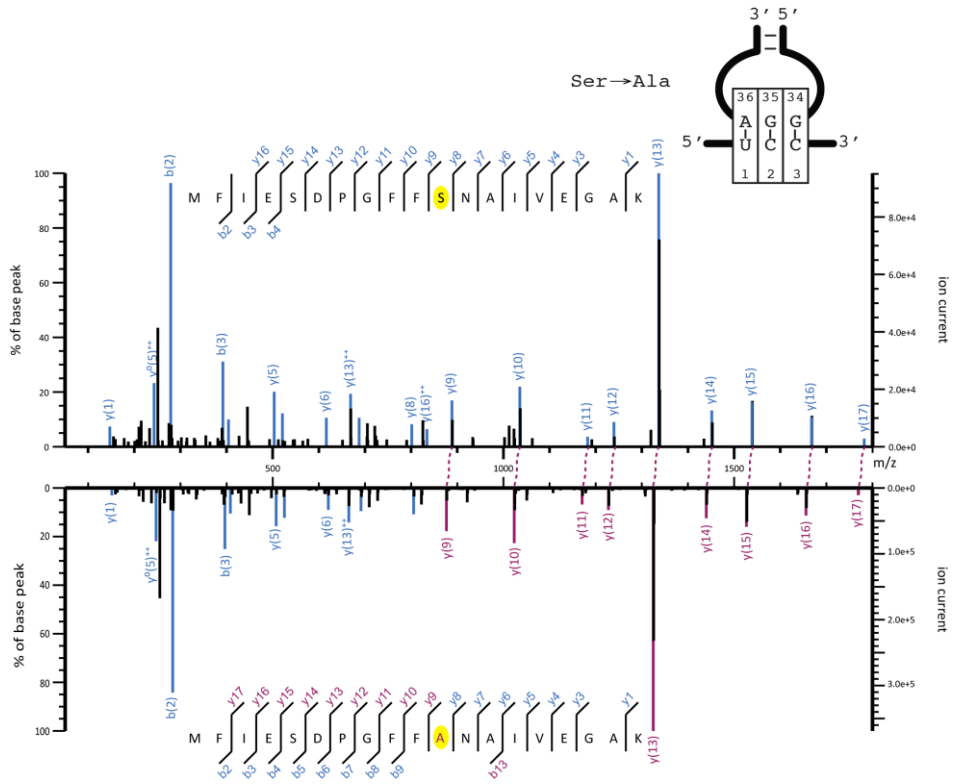

b

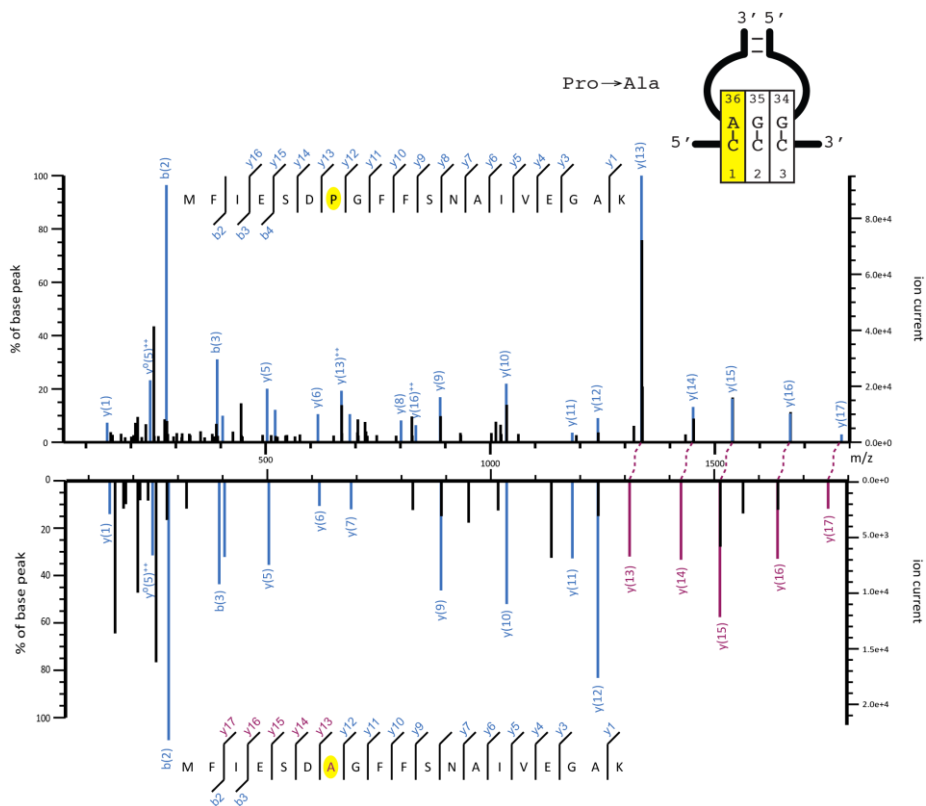

Supplement: gkaa221_supplemental_file.pdf [file gkaa221_supplemental_file.pdf]
